1 **Title**

2 **OligoFlow: rapid and sensitive virus quantification using flow cytometry and**  
3 **oligonucleotide hybridization**

4

5 James S. Paterson<sup>1\*</sup>, Lisa M. Dann<sup>1</sup>, Jessica Carlson-Jones<sup>1</sup>, Sarah Giles<sup>1</sup>, Connor McIvor<sup>1</sup>,  
6 Peter G. Speck<sup>1</sup> and James G. Mitchell<sup>1</sup>

7

8 <sup>1</sup> College of Science and Engineering, Flinders University, GPO Box 2100, Adelaide  
9 SA 5001, Australia

10

11 \*Corresponding author.

12

13 E-mail: jamespaterson686@hotmail.com

14 Secondary E-mail: james.paterson@sawater.com.au

15 Phone: +61402851037

16 Fax: +61882013015

17

18

19

20

21

22

23

24

25

26

27

28

29

30

31

32

33

34

35

36

37

38

39

40

41

42

43

44

45

46

47

48

49

50 **Abstract**

51 Flow cytometry is an established method for the detection and enumeration of viruses.  
52 However, the technique is unable to target specific viral species. Here, we present OligoFlow,  
53 a novel method for the rapid detection and enumeration of viruses by incorporating flow  
54 cytometry with species specific oligonucleotide hybridization. Using Ostried herpesvirus and  
55 dengue virus as model organisms, we demonstrate high-level detection and specificity. Our  
56 results represent a significant advancement in viral flow cytometry, opening the possibilities  
57 for the rapid identification of viruses in time critical settings.

58

59 **Main Body**

60 Viruses are a fundamental element of the world in which we live. Their significant roles  
61 range from moderating ocean biogeochemical cycles to causing global pandemics, such as  
62 the SARS-CoV-2 outbreak<sup>1,2</sup>. The enumeration of viruses began with plaque assays<sup>3,4</sup>, a  
63 method that is still used. Soon after, viruses were enumerated by electron and epifluorescence  
64 microscopy<sup>5,6,7,8</sup>, providing more detailed information on the structure and shape of viruses  
65 and more accurate estimates of abundance than plaque assays. The first flow cytometry-based  
66 viral abundance measurements detected and discriminated between two types of viruses  
67 based on differences in their light scattering<sup>9</sup>. However, the introduction of new nucleic acid  
68 staining dyes in the late 1990's led to the improvement in cytometric detection limits and has  
69 since transformed viral enumeration<sup>10,11</sup>, becoming a rapid and cost-effective method that  
70 continues to evolve<sup>12</sup>. In contrast to previous viral detection methods, flow cytometry  
71 routinely, rapidly and inexpensively counts single viruses from almost any sample type<sup>13</sup>. The  
72 technique characteristically takes tens of minutes for preparation and only minutes for a  
73 quantitative measurement. Current flow cytometry techniques enumerate viruses using  
74 generic nucleic acid fluorescent stains that target all viruses within a sample<sup>14</sup>. It is

75 impossible to determine the presence or abundance of one specific viral species using current  
76 methods. More recently, the use of Fluorescence *in Situ* Hybridisation (FISH) combined with  
77 flow cytometry (Flow-FISH) for the identification and quantification of bacterial populations  
78 has become a commonly used method<sup>15,16,17,18</sup>. However, the use of Flow-FISH for viral  
79 species identification is yet to occur. Here, we develop OligoFlow for the rapid detection and  
80 enumeration of individual virus species (Fig. 1a) by incorporating methodological elements  
81 of Flow-FISH, without the need for long incubations, washing and concentrating steps. Two  
82 viral species, Ostreid herpesvirus 1 (OsHV-1) and Dengue virus (DENV), were used as  
83 model organisms for the development of OligoFlow.

84 The detection and enumeration of DENV was initially carried out using the nucleic acid stain  
85 SYTO Orange 81 (Molecular Probes) to evaluate the measured size and fluorescence  
86 sensitivity of the Muse cytometer (Merck). The Muse cytometer, an entry level machine  
87 equipped with a green laser (532 nm excitation), was chosen for the development of  
88 OligoFlow due to its ease of use and future potential applications. DENV was successfully  
89 detected with a clear cytometric signature using yellow fluorescence (576nm emission) and  
90 forward scatter detectors, where viral positive samples were discriminated against unstained  
91 control samples (Fig. 1b) to ensure true representation of viral detection. Concentrations  
92 calculated from within the gated signatures equated to  $2.44 \pm 0.37 \times 10^6$  per mL<sup>-1</sup>. The  
93 supplied titre of DENV stock was approximately  $10^6$  PFU per mL<sup>-1</sup>, highlighting the ability  
94 of the Muse cytometer for its viral detection capability and enumeration accuracy.

95 After successful detection and enumeration of DENV using a standard nucleic acid  
96 fluorescent dye, specific oligonucleotide fluorophores (Molecular Probes) for DENV and  
97 OsHV-1 were incorporated to combine flow cytometry with oligonucleotide hybridization.  
98 By combining species specific fluorescent probes and flow cytometry with short  
99 hybridization and preparation time, viral species of interest can be detected and enumerated

100 rapidly and inexpensively regardless of sample type. We based our OligoFlow method on the  
101 denaturation and annealing aspects of PCR for successful probe attachment (Fig. 1a). The  
102 detection and enumeration of purified DENV and OsHV-1 samples was achieved using the  
103 OligoFlow method (Fig. 1c,d). The concentration of DENV using this method was  $1.03 \pm$   
104  $0.45 \times 10^6$  per mL<sup>-1</sup>, while OsHV-1 concentration was  $2.89 \pm 0.50 \times 10^7$  per mL<sup>-1</sup>. The  
105 calculated concentrations of DENV using OligoFlow are consistent to concentrations  
106 identified with the same sample stained with SYTO Orange, demonstrating the accuracy and  
107 specificity of the OligoFlow method.

108 To test the applicability of OligoFlow on different sample types, Pacific oyster, *Crassostrea*  
109 *gigas*, tissue infected with OsHV-1 was extracted. Extracted OsHV-1 from tissue samples  
110 were successfully detected and enumerated using OligoFlow (Fig. 2a). The concentration of  
111 OsHV-1 from extracted oyster tissue varied greatly between individual oysters and ranged  
112 from below detection of 1 virus per mg<sup>-1</sup> up to  $1.29 \times 10^6$  viruses per mg<sup>-1</sup> of oyster tissue  
113 (Fig. 2a). These results indicate that OligoFlow is sensitive and specific enough to  
114 quantitatively determine the level of infection within an oyster population. The ability to  
115 integrate OligoFlow into time critical microbiological settings, such as cystic fibrosis  
116 exacerbations<sup>19</sup>, could provide rapid level of infection information to assist with alternative  
117 treatments and prevent death.

118 Next, to test the accuracy of OligoFlow we carried out a sample dilution experiment. Serial  
119 dilutions starting at 1:10 and up to 1:40,000 of OsHV-1 extracted from oyster tissue were  
120 prepared and analysed on the Muse cytometer. The concentration of OsHV-1 at 1:10 dilution  
121 was  $1.20 \pm 0.04 \times 10^6$  per mg<sup>-1</sup> ( $n = 3$ ,  $\pm$  SE) and at 1:40,000 dilution was  $1.64 \times 10^2$  per mg<sup>-1</sup>  
122 (Fig. 2b). A power trendline was applied to all dilution samples and resulted in a R<sup>2</sup> value of  
123 0.9983 ( $p < 0.0001$ ; Fig. 2b). This highlights a strong significant relationship between sample  
124 concentration and the accuracy of detection, indicating that the concentration of a virus has

125 no effect on the accuracy of OligoFlow. The detection limit of our method is 14 viruses per  
126 mL<sup>-1</sup>, which is the detection of one virus particle from the analysis of a neat sample. This  
127 compares to qPCR methods having a reliable limit of detection as low as 384 copies of a  
128 target virus per mL<sup>-1</sup> in a single reaction<sup>20,21</sup>.

129 Finally, the OligoFlow methodology was validated to ensure replicable and accurate use  
130 across multiple flow cytometer platforms. Purified OsHV-1 was analysed on a CytoFlex S  
131 cytometer (Beckman Coulter) equipped with violet (408nm), blue (488nm) and red (638nm)  
132 laser excitation and green (520nm) and orange (585nm) emission detectors. Samples were  
133 prepared identically with the samples analysed using the Muse cytometer. Successful  
134 detection and enumeration of OsHV-1 was achieved on the CytoFlex S (Fig. 2c) with a  
135 calculated concentration of  $2.47 \times 10^7$  per mL<sup>-1</sup>. This highlights that the OligoFlow method is  
136 not restricted to just one cytometer and can be transferred to any cytometry platform available  
137 without the loss of accuracy and detection capability.

138 The development of OligoFlow for the detection and enumeration of OsHV-1 and DENV has  
139 shown high accuracy, sensitivity and specificity with rapid and simple methodology that  
140 builds on the previous methods of bacterial Flow-FISH<sup>17,18</sup>. We have demonstrated that this  
141 method is also unrestricted by cytometer platform, making OligoFlow accessible to all flow  
142 cytometry users. The ability to identify and count a species of interest makes OligoFlow a  
143 method that could be utilized across a range of research, clinical and quality control settings.  
144 These features open the possibilities for the rapid identification of viruses in time critical  
145 settings.

146

147

148

149

150 **Methods**

151 **Source of DENV and OsHV-1 virus**

152 Purified culture samples of DENV were provided by the Virus Research Laboratory (Flinders  
153 University, Australia) at a titre of approximately  $10^6$  PFU per  $\text{mL}^{-1}$ . Initial samples of OsHV-  
154 1 were obtained from the Animal Health Laboratory, Department of Primary Industries,  
155 Parks, Water and Environment, Tasmania, Australia at a titre of approximately  $10^7$  PFU per  
156  $\text{mL}^{-1}$ . These samples were from extracted Pacific oyster tissue that was purified and  
157 suspended in filtered seawater. Samples were then snap frozen in liquid nitrogen and  
158 transported then stored at  $-80^\circ\text{C}$ . Further samples of OsHV-1 were obtained from the South  
159 Australian Research Development Institute (SARDI) from an infection study where infected  
160 oyster tissue samples were collected. Tissue samples at an approximate size of 2 mm by 3  
161 mm were cut from the oyster then placed in a microfuge tube with 500  $\mu\text{l}$  of filtered and  
162 sterilised TE Buffer (10 mM Tris, 1 mM EDTA). The sample was then mechanically  
163 masticated for 5 min then centrifuged for 1 min at 6000 rpm. The supernatant containing  
164 OsHV-1 was separated and filtered through a  $0.22\ \mu\text{m}$  syringe filter and collected into a  
165 sterilized microfuge tube, snap frozen in liquid nitrogen and stored at  $-80^\circ\text{C}$  until analysis.

166

167 **Development of a virus specific fluorophore**

168 Fluorescent probes specifically for DENV and OsHV-1 were constructed through an online  
169 platform with Sigma-Aldrich Australia. Specifically, Molecular Beacons were developed for  
170 each virus that allowed sequence specific and highly sensitive detection. For OsHV-1, the  
171 primers C2F (CTCTTTACCATGAAGATACCCACC) and C6R  
172 (GTGCACGGCTTACCATTTTT) were used<sup>22</sup>. For DENV, the primers DENV5.1F  
173 (GCAGATCTCTGATGAATAACCAAC) and DENV3.2R  
174 (TTGTCAGCTGTTGTACAGTCG) were used<sup>23</sup>. All Molecular Beacons probes were

175 attached with a HEX fluorophore (535nm excitation, 556nm emission) and a BHQ-1  
176 quencher. The BHQ-1 molecule was used to quench the fluorescence of the HEX fluorophore  
177 until the attachment of the primer sequence occurs in the reaction.

178

### 179 **Detection and enumeration of DENV using SYTO Orange**

180 Initial detection of DENV was carried out using SYTO Orange 81 (Molecular Beacons). This  
181 nucleic acid fluorescent stain was preferred due to the excitation (530 nm) and emission (544  
182 nm) properties aligning closely to the Muse cytometer excitation and emission values.

183 Samples for DENV were diluted 1:10 by adding 50  $\mu$ l of virus sample to 450  $\mu$ l of 0.02  $\mu$ M  
184 filtered TE buffer (10 mM Tris, 1 mM EDTA). For each sample, 20  $\mu$ l of SYTO Orange 81  
185 (2.5  $\mu$ M final concentration) was added then samples were incubated in the dark at 80°C for  
186 10 minutes<sup>14</sup>.

187

### 188 **Sample preparation for viral species detection by OligoFlow**

189 Samples for DENV and OsHV-1 were diluted 1:10 to assist in detection and not over saturate  
190 the cytometer detectors. Specifically, 25  $\mu$ l of each virus was diluted in 225  $\mu$ l of 0.02  $\mu$ M  
191 filtered TE buffer (10 mM Tris, 1 mM EDTA). For each sample, 0.5  $\mu$ l of each forward and  
192 reverse primer probe (20 nM final concentration) was added then samples were placed on a  
193 heat block at 80°C for 10 minutes then at 60°C for 5 minutes. Samples were then removed  
194 from the heat block at stored in the dark at room temperature until analysis.

195

### 196 **Flow cytometric analysis of DENV and OsHV-1**

197 Samples of DENV and OsHV-1 were analysed on a Muse cytometer (Merck). Prior to each  
198 session calibration beads were prepared and run in triplicate for quality control and  
199 calibration of the volumetric sensor. After the preparation and incubation of each sample as

200 described above, individual samples were loaded into the machine and analysed for 2 minutes  
201 or 50,000 events. After the analysis of each sample the cytometer was rinsed with sterile  
202 MilliQ water to eliminate any sample crossover. Further samples of OsHV-1 were analysed  
203 on the CytoFlex S cytometer (Beckman Coulter). Calibration beads were run before each  
204 session and samples were analysed for 2 minutes.

205

### 206 **Serial dilution of OsHV-1 for analysis by OligoFlow**

207 Samples of OsHV-1 extracted from infected oyster tissue were prepared in a serial dilution,  
208 whereby OsHV-1 was diluted in 0.02 µm filtered TE Buffer (10 mM Tris, 1 mM EDTA) at  
209 dilutions of 1:10, 1:100, 1:500, 1:1,000, 1:5,000, 1:10,000, 1:15,000, 1:30,000, 1:35,000 and  
210 1:40,000. Each dilution was prepared and analysed in triplicate using the Muse cytometer.

211

### 212 **Data analysis**

213 Raw flow cytometry (FCS) files were exported from the Muse and CytoFLEX S cytometers  
214 and analysed in FlowJo software (Becton Dickinson). Populations of DENV and OsHV-1  
215 were discriminated based on differences in forward scatter (FSC) and yellow fluorescence on  
216 the Muse, and differences in side scatter (SSC) and green fluorescence on the CytoFLEX S.  
217 Concentrations were calculated using the raw FCS files combined with the calibrated  
218 analysed volume of each sample recorded by the Muse and CytoFLEX cytometers.

219

220

221

222

223

224



## 225 **References**

- 226 1. Suttle, C. A. Viruses in the sea. *Nature* **437**, 356-361 (2005).
- 227 2. Andersen, K. G., Rambaut, A., Lipkin, I. W., Holmes, E. C., Garry, R. F. The proximal  
228 origin of SARS-CoV-2. *Nature Medicine* **26**, 450-455 (2020).
- 229 3. Dulbecco, R. Production of plaques in monolayer tissue cultures by single particles of an  
230 animal virus. *PNAS* **38(8)**, 747-752 (1952).
- 231 4. Russell, W. C. A sensitive and precise plaque assay for Herpes Virus. *Nature* **195**, 1028-  
232 1029 (1962).
- 233 5. Brenner, S., Horne, R. W. A negative staining method for high resolution electron  
234 microscopy of viruses. *Biochimica et Biophysica Acta* **34**, 103-110 (1959).
- 235 6. Adrian, M., Dubochet, J., Lepault, J., McDowell, A. W. Cryo-electron microscopy of  
236 viruses. *Nature* **308**, 32-36 (1984).
- 237 7. Bergh, Ø., Børsheim, K. Y., Bratbak, G., Heldal, M. High abundance of viruses found in  
238 aquatic environments. *Nature* **340**, 467-468 (1989).
- 239 8. Suttle, C. A., Chan, A. M., Cottrell, M. T. Infection of phytoplankton by viruses and  
240 reduction of primary productivity. *Nature* **347**, 467-468 (1990).
- 241 9. Hercher, M., Mueller, W., Shapiro, H. M. Detection and discrimination of individual  
242 viruses by flow cytometry. *Journal of Histochemistry and Cytochemistry* **27(1)**, 350-352  
243 (1979).
- 244 10. Marie, D., Brussaard, C. P. D., Thyrhaug, R., Bratbak, G., Vaultot, D. Enumeration of  
245 marine viruses in culture and natural samples by flow cytometry. *Applied Environmental*  
246 *Microbiology* **65**, 45-52 (1999).
- 247 11. Brussaard, C. P. D., Marie, D., Bratbak, G. Flow cytometric detection of viruses. *Journal*  
248 *of Virological Methods* **85**, 175-182 (2000).

- 249 12. Rubbens, P., Props, R., Kerckhof, F-M., Boon, N., Waegeman, W. Cytometric  
250 fingerprints of gut microbiota predict Crohn's disease state. *ISMEJ* **15**, 354-358 (2021).
- 251 13. Carlson-Jones, J. A. P., Kontos, A., Kennedy, D., Martin, J., Lushington, K., McKerral,  
252 J., Paterson, J. S., Smith, R. J., Dann, L. M., Speck, P., Mitchell, J. G. The microbial  
253 abundance dynamics of the paediatric oral cavity before and after sleep. *Journal of Oral*  
254 *Microbiology* **12(1)**, 1741254 (2020).
- 255 14. Brussaard, C. P. D. Optimization of procedures for counting viruses by flow cytometry.  
256 *Applied Environmental Microbiology* **70**, 1506–1513 (2004).
- 257 15. Silverman, A. P., Kool, E. T. Quenched autoligation probes allow discrimination of live  
258 bacterial species by single nucleotide differences in rRNA. *Nucleic Acid Research* **33(15)**,  
259 4978-4986 (2005).
- 260 16. Amann, R., Fuchs, B. M. Single-cell identification in microbial communities by improved  
261 fluorescence *in situ* hybridization techniques. *Nature Reviews Microbiology* **6**, 339-348  
262 (2008).
- 263 17. Yilmaz, S., Haroon, M. F., Rabkin, B. A., Tyson, G. W., Hugenholtz, P. Fixation-free  
264 fluorescence *in situ* hybridization for targeted enrichment of microbial populations.  
265 *ISMEJ* **4**, 1352-1356 (2010).
- 266 18. Batani, G., Bayer, K., Böge, J., Hentschel, U., Thomas, T. Fluorescence *in situ*  
267 hybridization (FISH) and cell sorting of living bacteria. *Scientific Reports* **9**, 18618  
268 (2019).
- 269 19. Cobián Güemes, A. G., Lim, Y. W., Quinn, R. A., Conrad, D. J., Benler, S., Maughan, H.,  
270 Edwards, R., Brettin, T., Cantu, V. A., Cuevas, D., Hamidi, R., Dorrestein, P., Rohwer, F.  
271 Cystic fibrosis rapid response: translating multi-omics data into clinically relevant  
272 information. *mBio* **10(2)**, 10:e00431-19 (2019).

- 273 20. Panning, M., Eickmann, M., Landt, O., et al., Drosten, C. Detection of Influenza A  
274 (H1N1) virus by real-time RT-PCR. *Euro Surveillance* **14(36)**, 1-6 (2009).
- 275 21. Tattiyapong, P., Sirikanchana, K., Surachetpong, W. Development and validation of a  
276 reverse transcription quantitative polymerase chain reaction for tilapia lake virus  
277 detection in clinical samples and experimentally challenged fish. *Journal of Fish Diseases*  
278 **41**, 255-261 (2017).
- 279 22. Arzul, I., Renault, T., Lipart, C., Davison, A. J. Evidence for inter species transmission of  
280 oyster herpesvirus in marine bivalves. *Journal of General Virology* **82(4)**, 151-160  
281 (2001).
- 282 23. Calvert, J. K., Helbig, K. J., Dimasi, D., Cockshell, M., Beard, M. R., Pitson, S. M.,  
283 Bonder, C. S., Carr, J. M. Dengue virus infection of primary endothelial cells induces  
284 innate immune responses, changes in endothelial cells function and is restricted by  
285 interferon-stimulated responses. *Journal of Interferon & Cytokine Research* **35(8)**, 654-  
286 665 (2015).

287

## 288 **Acknowledgements**

289 This project was funded by the Fisheries Research and Development Corporation (FRDC)  
290 under project number 2016-806. We thank Graeme Knowles from the Animal Health  
291 Laboratory, Department of Primary Industries, Parks, Water and Environment, Tasmania and  
292 to Dr Marty Deveney from SARDI Aquatic Sciences for sourcing and providing oyster  
293 samples infected with OsHV-1 for research to be conducted on. We also thank Associate  
294 Professor Jill Carr from the College of Medicine and Public Health, Flinders University for  
295 providing Dengue virus samples to conduct experiments.

296

## 297 **Competing interests**

298 The authors declare no competing interests.

299 **Figure Captions**

300 **Fig. 1: Principal method of OligoFlow and successful application with DENV and**

301 **OsHV-1. a,** Schematic overview of the OligoFlow methodology incorporating flow  
302 cytometry and oligonucleotide hybridization. Sequence specific Molecular Beacons  
303 fluorophores were designed to target the viral species of interest and then added to each  
304 sample. Samples were then incubated for fluorophore permeation through the viral capsid,  
305 then annealed for fluorophore binding to the complementary sequence. Analysis of each  
306 sample was carried out on the Merck Muse flow cytometer for the detection of yellow  
307 fluorescence, indicating successful probe binding, and forward scatter, a proxy for particle  
308 size. **b,** Initial analysis of pure DENV cultured samples on the Muse cytometer using generic  
309 nucleic acid fluorescent staining. The left cytogram depicts a “noise” sample with the  
310 addition of 1  $\mu\text{m}$  fluorescent beads, while the cytogram on the right represents a DENV  
311 sample where positive events are detected in the gated region. Each black dot on all  
312 cytograms represents a detected particle. **c,** Detection of DENV using OligoFlow. The top  
313 cytogram represents a “noise” sample with minimal events within the gated region. The  
314 middle cytogram shows strong detection of DENV within the gated region, while the bottom  
315 histogram highlights the clear separation of yellow fluorescence signal between the “noise”  
316 and positive sample cytograms. **d,** Successful detection of OsHV-1 using OligoFlow, where  
317 the top cytogram represents a “noise” sample with no events present in the gated region. The  
318 middle cytogram shows an intense signal of OsHV-1 present in the gated region and the  
319 histogram shows separation of signal between the two cytograms.

320

321

322

323 **Fig. 2: Specificity and sensitivity of OligoFlow with OsHV-1 extracted from oyster**  
324 **tissue. a,** The detection of OsHV-1 in infected Pacific oysters, *Crassostrea gigas*, exhibited  
325 varying levels of viral load. The top left cytogram depicts a “noise” sample control, while all  
326 other cytograms represent individual oyster tissue extracts. The top right cytogram shows an  
327 oyster with little to no infection, while the bottom right cytogram shows an oyster heavily  
328 infected with OsHV-1. **b,** Serial dilution of extracted OsHV-1 from oyster tissue using  
329 OligoFlow exhibits a significant power trend across 10 dilutions ranging from 1:10 to  
330 1:40,000. Dilution factors have not been factored in to calculate OsHV-1 concentration. The  
331 data points and error bars are means and standard errors, respectively, and the trend line is a  
332 power law. **c,** Analysis of extracted OsHV-1 on the Beckman Coulter CytoFLEX S  
333 cytometer. The left cytogram represents a “noise” sample with the addition of 1  $\mu\text{m}$   
334 fluorescent beads, while the right cytogram shows clear detection of OsHV-1 in the gated  
335 region, demonstrating the capability of OligoFlow across multiple flow cytometry platforms.  
336  
337  
338  
339  
340  
341  
342  
343  
344  
345  
346

347 **Figure 1**

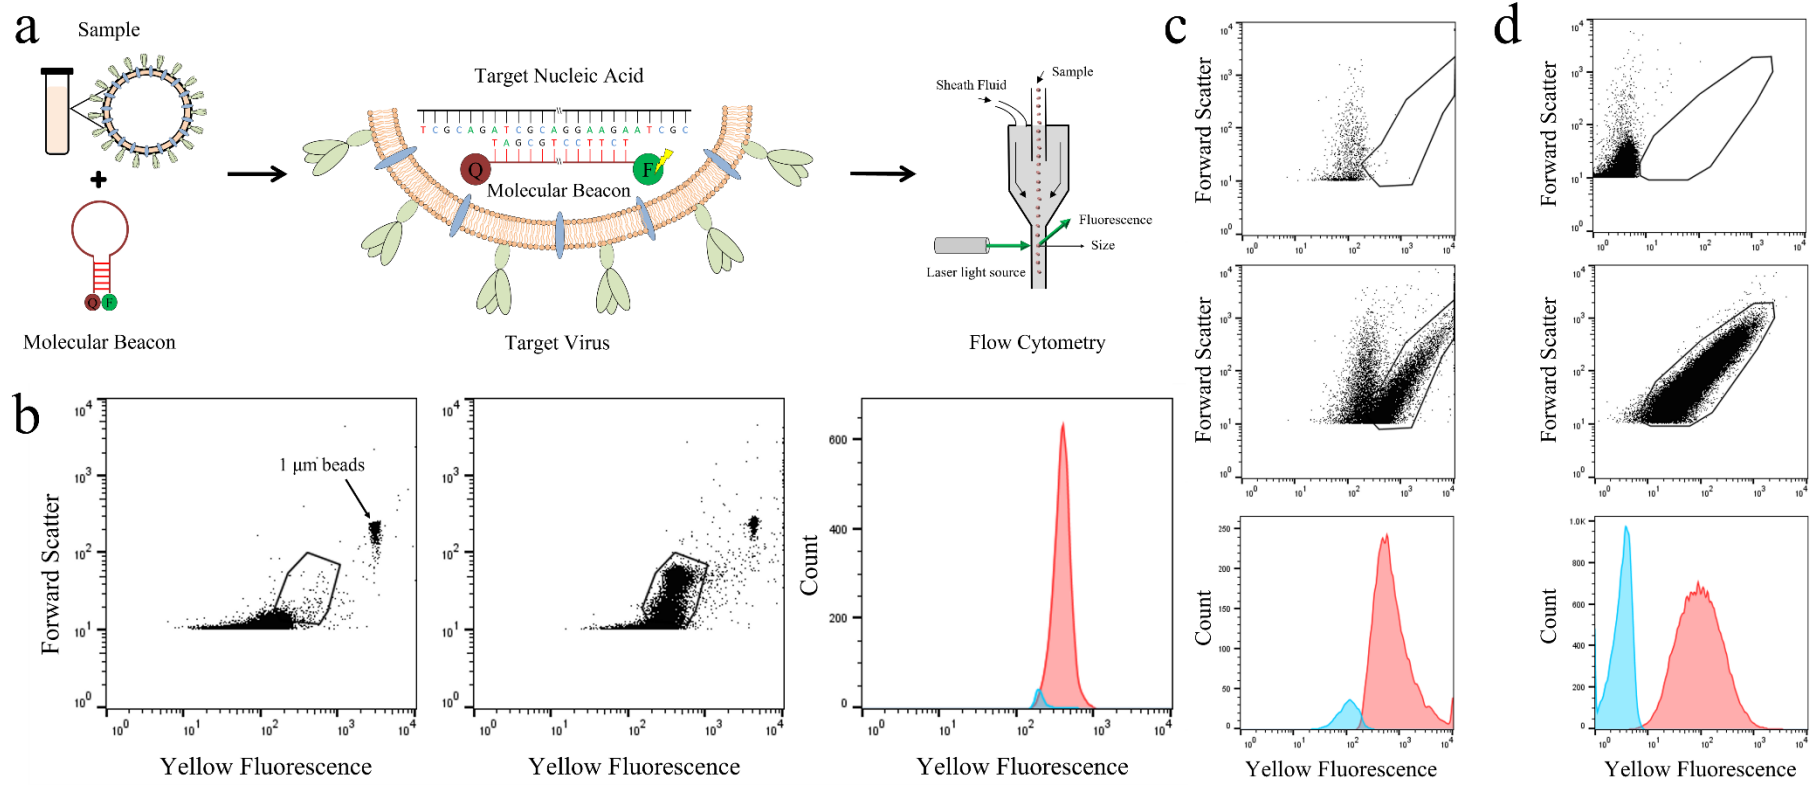

348

349

350

351

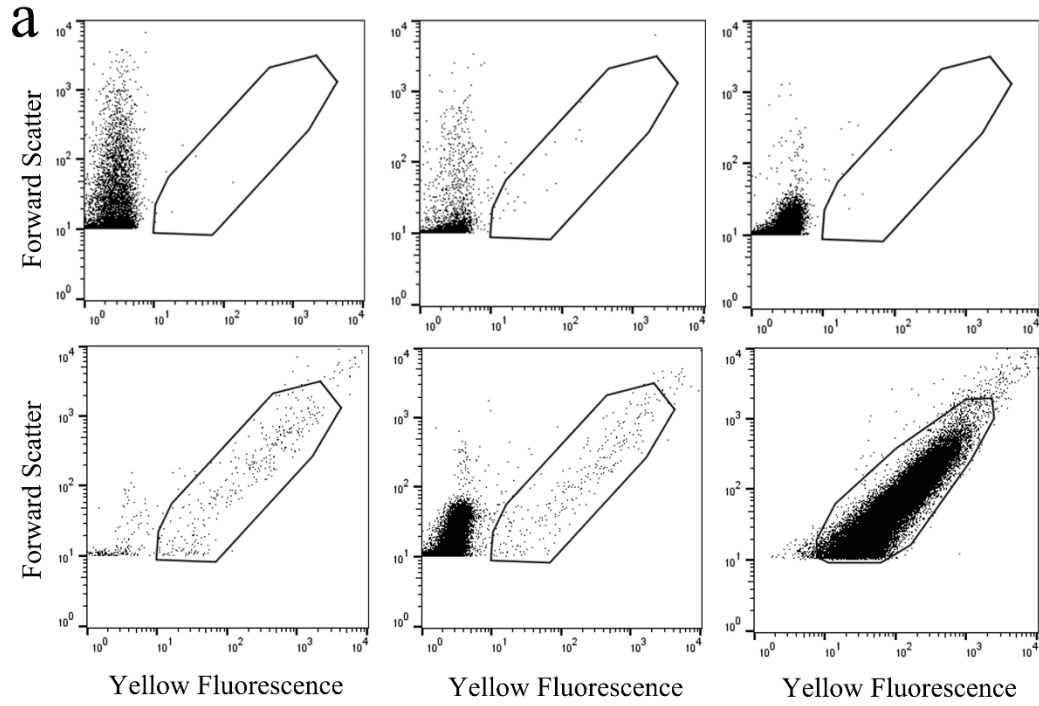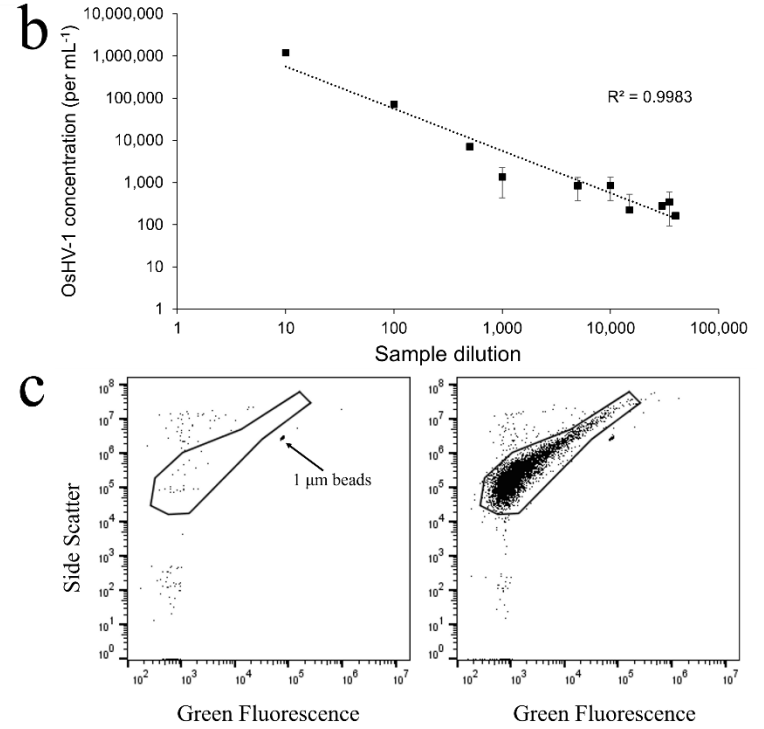

Source: https://www.biorxiv.org/content/10.1101/2022.06.23.497420v1.full.pdf
